# Supplementary material for: Influence of Enzyme Supplementation in the Diets of Broiler Chickens Formulated with Different Corn Hybrids Dried at Various Temperatures
Source: MDPI journal article supplement (doi:10.3390/ani11030643), 2021-02-28
Supplement: s1 [file s1]

# Supplementary Materials: Influence of Enzyme Supplementation in the Diets of Broiler Chickens Formulated with Different Corn Hybrids Dried at Various Temperatures

Franciele C. N. Giacobbo, Cinthia Eyng, Ricardo V. Nunes, Cleison de Souza, Levy V. Teixeira, Rachel Pilla, Jan S. Suchodolski and Cristiano Bortoluzzi

**Table S1.** Feed conversion ratio of broilers, from 1 to 21 days, fed diets containing different corn hybrids dried at two temperatures.

| Hybrid | Temperature        |                     |
|--------|--------------------|---------------------|
|        | 80 °C              | 110 °C              |
| 1      | 1.371              | 1.357 <sup>AB</sup> |
| 2      | 1.380 <sup>a</sup> | 1.342 <sup>Bb</sup> |
| 3      | 1.358              | 1.377 <sup>A</sup>  |

<sup>A,B/a,b</sup>Means followed by distinct capital letters, in the same column, and small letters, in the same row, are different ( $p \leq 0.05$ ) by Tukey's or F's test, respectively.

**Table S2.** Feed conversion ratio of broilers fed diets containing corn dried at two temperatures and with or without inclusion of enzymatic blend.

| Enzyme         | 1–7 Days           |        | 1–42 Days           |                    |
|----------------|--------------------|--------|---------------------|--------------------|
|                | Temperature        |        | Temperature         |                    |
|                | 80 °C              | 110 °C | 80 °C               | 110 °C             |
| With enzyme    | 1.254 <sup>B</sup> | 1.281  | 1.612 <sup>B</sup>  | 1.619              |
| Without enzyme | 1.356 <sup>A</sup> | 1.308  | 1.633 <sup>Aa</sup> | 1.616 <sup>b</sup> |

<sup>A,B/a,b</sup>Means followed by distinct capital letters, in the same column, and small letters, in the same row, are different ( $p \leq 0.05$ ) by F test; The enzymatic blend contained 80 KNU/kg of amylase (RONOZYME<sup>®</sup> HiStarch), 100 FXU/kg of xylanase (RONOZYME<sup>®</sup> WX), and 15,000 PROT/kg of protease (RONOZYME<sup>®</sup> ProAct), and all the diets were formulated with the inclusion of phytase (1,000 FYT/kg of feed, RONOZYME<sup>®</sup> Hiphos).

**Table S3.** Villus height (μm) of jejunum of broilers, at 21 days, fed diets containing different corn hybrids and with or without inclusion of enzymatic blend.

| Enzyme         | Hybrid 1             | Hybrid 2             | Hybrid 3            |
|----------------|----------------------|----------------------|---------------------|
| With enzyme    | 753.68 <sup>Aa</sup> | 725.05 <sup>b</sup>  | 737.17 <sup>b</sup> |
| Without enzyme | 642.15 <sup>Bb</sup> | 680.09 <sup>ab</sup> | 716.89 <sup>a</sup> |

<sup>A,B/a,b</sup>Means followed by distinct capital letters, in the same column, and small letters, in the same row, are different ( $p \leq 0.05$ ) by F's or Tukey's test, respectively; The enzymatic blend contained 80 KNU/kg of amylase (RONOZYME<sup>®</sup> HiStarch), 100 FXU/kg of xylanase (RONOZYME<sup>®</sup> WX), and 15,000 PROT/kg of protease (RONOZYME<sup>®</sup> ProAct), and all the diets were formulated with the inclusion of phytase (1 000 FYT/kg of feed, RONOZYME<sup>®</sup> Hiphos).

**Table S4.** Villus:crypt ratio and area of absorption (μm<sup>2</sup>) of jejunum of broilers fed diets containing different corn hybrids dried at two temperatures.

| Hybrids | 21 Days            |                     | 42 Days             |                    |                     |                    |
|---------|--------------------|---------------------|---------------------|--------------------|---------------------|--------------------|
|         | Villus:crypt ratio |                     | Villus:crypt ratio  |                    | Area of absorption  |                    |
|         | 80 °C              | 110 °C              | 80 °C               | 110 °C             | 80°C                | 110 °C             |
| 1       | 10.94              | 10.81 <sup>B</sup>  | 12.27 <sup>Aa</sup> | 10.26 <sup>b</sup> | 13.92 <sup>Aa</sup> | 12.12 <sup>b</sup> |
| 2       | 10.97              | 11.08 <sup>B</sup>  | 11.58 <sup>A</sup>  | 11.40              | 14.00 <sup>Aa</sup> | 12.40 <sup>b</sup> |
| 3       | 10.82 <sup>b</sup> | 12.27 <sup>Aa</sup> | 10.32 <sup>B</sup>  | 11.53              | 12.38 <sup>B</sup>  | 13.42              |

<sup>A,B/a,b</sup>Means followed by distinct capital letters, in the same column, and small letters, in the same row, are different ( $p \leq 0.05$ ) by Tukey's or F's test, respectively.

**Table S5.** Crypt depth ( $\mu\text{m}$ ) and villus:crypt ratio of broilers, at 42 days, fed diets containing corn dried at two temperatures and with or without inclusion of enzymatic blend.

| Enzyme         | Crypt Depth         |                    | Villus:Crypt Ratio |        |
|----------------|---------------------|--------------------|--------------------|--------|
|                | 80 °C               | 110 °C             | 80 °C              | 110 °C |
| With enzyme    | 74.83 <sup>Aa</sup> | 67.74 <sup>b</sup> | 10.29 <sup>B</sup> | 11.51  |
| Without enzyme | 67.44 <sup>Bb</sup> | 72.92 <sup>a</sup> | 12.16 <sup>A</sup> | 10.63  |

<sup>A,B/a,b</sup>Means followed by distinct capital letters, in the same column, and small letters, in the same row, are different ( $p \leq 0.05$ ) by F test; The enzymatic blend contained 80 KNU/kg of amylase (RONOZYME<sup>®</sup> HiStarch), 100 FXU/kg of xylanase (RONOZYME<sup>®</sup> WX), and 15,000 PROT/kg of protease (RONOZYME<sup>®</sup> ProAct), and all the diets were formulated with the inclusion of phytase (1,000 FYT/kg of feed, RONOZYME<sup>®</sup> Hiphos).

**Table S6.** Abundance of phyla, classes and bacterial orders found in the cecal microbiota of broilers, at 21 days of age, fed diets with or without inclusion of enzymatic blend.

|                     | With Enzyme |             | Without Enzyme |             |                 |
|---------------------|-------------|-------------|----------------|-------------|-----------------|
|                     | Average     | Interval    | Average        | Interval    | <i>p</i> -Value |
| Phylum              |             |             |                |             |                 |
| Actinobacteria      | 0.38        | 0.24–0.92   | 0.64           | 0.29–1.40   | 0.161           |
| Bacteroidetes       | 1.58        | 0.87–2.48   | 2.01           | 0.00–4.64   | 0.286           |
| Firmicutes          | 94.83       | 92.26–97.98 | 96.49          | 91.77–97.35 | 0.863           |
| Proteobacteria      | 0.07        | 0–0.31      | 0.12           | 0–2.89      | 0.262           |
| Tenericutes         | 2.06        | 0.23–3.95   | 0.98           | 0.13–2.20   | 0.014           |
| Verrucomicrobia     | 0.16        | 0–3.68      | 0.35           | 0–1.41      | 0.813           |
| Class               |             |             |                |             |                 |
| Coriobacteriia      | 0.38        | 0.24–0.92   | 0.61           | 0.29–1.40   | 0.162           |
| Bacteroidia         | 1.58        | 0.87–2.48   | 2.01           | 0–4.64      | 0.286           |
| Bacilli             | 14.33       | 7.07–25.63  | 7.17           | 2.55–14.87  | 0.032           |
| Clostridia          | 80.66       | 69.62–85.41 | 88.22          | 75.33–90.56 | 0.094           |
| Erysipelotrichi     | 0.98        | 0.41–3.30   | 1.85           | 0.62–3.30   | 0.489           |
| Gammaproteobacteria | 0.07        | 0–0.31      | 0.12           | 0–2.87      | 0.262           |
| Mollicutes          | 2.06        | 0.23–3.95   | 0.98           | 0.13–2.20   | 0.014           |
| Verrucomicrobiae    | 0.16        | 0–3.68      | 0.35           | 0–1.41      | 0.813           |
| Order               |             |             |                |             |                 |
| Coriobacteriales    | 0.38        | 0.24–0.92   | 0.61           | 0.29–1.40   | 0.162           |
| Bacteroidales       | 1.58        | 0.87–2.48   | 2.01           | 0–4.64      | 0.286           |
| Bacillales          | 0.11        | 0.02–0.16   | 0.06           | 0–0.18      | 0.230           |
| Lactobacillales     | 14.26       | 6.99–25.52  | 7.08           | 2.49–14.87  | 0.040           |
| Clostridiales       | 80.66       | 69.62–85.41 | 88.22          | 75.33–90.56 | 0.094           |
| Erysipelotrichales  | 0.98        | 0.41–3.30   | 1.85           | 0.62–3.30   | 0.489           |
| Enterobacteriales   | 0.07        | 0–0.31      | 0.12           | 0–2.87      | 0.262           |
| Anaeroplasmatales   | 0.19        | 0.03–0.64   | 0              | 0–0.84      | 0.025           |
| RF39                | 1.82        | 0.20–3.76   | 0.80           | 0.13–2.20   | 0.014           |
| Verrucomicrobiales  | 0.16        | 0–3.68      | 0.35           | 0–1.41      | 0.813           |

The enzymatic blend contained 80 KNU/kg of amylase (RONOZYME<sup>®</sup> HiStarch), 100 FXU/kg of xylanase (RONOZYME<sup>®</sup> WX), and 15,000 PROT/kg of protease (RONOZYME<sup>®</sup> ProAct), and all the diets were formulated with the inclusion of phytase (1,000 FYT/kg of feed, RONOZYME<sup>®</sup> Hiphos).

**Table S7.** Digestible energy (kcal/kg) and the digestibility coefficients (%) of dry matter, crude protein and mineral matter determined with broilers fed diets containing different corn hybrids, dried at different temperatures, and with or without the inclusion of blend enzymatic.

| Hybrids | Digestible energy |                   |                   |                   | CDDM               |                    |                    |                    | CDCP               |                    |                    |                    | CDMM               |                    |                    |                    |
|---------|-------------------|-------------------|-------------------|-------------------|--------------------|--------------------|--------------------|--------------------|--------------------|--------------------|--------------------|--------------------|--------------------|--------------------|--------------------|--------------------|
|         | 80 °C             |                   | 110 °C            |                   | 80 °C              |                    | 110 °C             |                    | 80 °C              |                    | 110 °C             |                    | 80 °C              |                    | 110 °C             |                    |
|         | with              | with-out          | with              | with-out          | with               | with-out           | with               | with-out           | with               | with-out           | with               | with-out           | with               | with-out           | with               | with-out           |
| 1       | 2838 <sup>a</sup> | 2976 <sup>a</sup> | 3084 <sup>a</sup> | 2980 <sup>a</sup> | 62.50 <sup>a</sup> | 65.28 <sup>a</sup> | 67.58 <sup>a</sup> | 64.72 <sup>b</sup> | 68.37 <sup>a</sup> | 71.67 <sup>a</sup> | 72.59 <sup>a</sup> | 68.08 <sup>b</sup> | 36.08 <sup>a</sup> | 38.10 <sup>a</sup> | 42.65 <sup>a</sup> | 22.65 <sup>b</sup> |
| 2       | 3255 <sup>a</sup> | 2865 <sup>b</sup> | 3025 <sup>a</sup> | 2799 <sup>b</sup> | 71.97 <sup>a</sup> | 63.02 <sup>b</sup> | 66.18 <sup>a</sup> | 61.26 <sup>b</sup> | 76.42 <sup>a</sup> | 67.85 <sup>b</sup> | 72.54 <sup>a</sup> | 66.48 <sup>b</sup> | 52.27 <sup>a</sup> | 30.41 <sup>b</sup> | 38.60 <sup>a</sup> | 37.01 <sup>a</sup> |
| 3       | 3086 <sup>a</sup> | 2915 <sup>b</sup> | 3223 <sup>a</sup> | 2465 <sup>b</sup> | 68.18 <sup>a</sup> | 64.85 <sup>a</sup> | 71.56 <sup>a</sup> | 54.34 <sup>b</sup> | 72.21 <sup>a</sup> | 60.84 <sup>b</sup> | 71.06 <sup>a</sup> | 59.92 <sup>b</sup> | 40.57 <sup>a</sup> | 26.69 <sup>b</sup> | 46.27 <sup>a</sup> | 34.54 <sup>b</sup> |

CDDM = coefficient of digestibility of dry matter; CDCP = coefficient of digestibility of crude protein; CDMM = coefficient of digestibility of mineral matter; <sup>a,b</sup>Means within each group (drying temperature - 80 and 110 °C) for each corn hybrid, followed by different letters on the row are different ( $p \leq 0.05$ ) by F test; The enzymatic blend contained 80 KNU/kg of amylase (RONOZYME® HiStarch), 100 FXU/kg of xylanase (RONOZYME® WX), and 15,000 PROT/kg of protease (RONOZYME® ProAct), and all the diets were formulated with the inclusion of phytase (1,000 FYT/kg of feed, RONOZYME® Hiphos).

**Table S8.** Digestible energy (kcal/kg) and the digestibility coefficients (%) of dry matter, crude protein and mineral matter determined with broilers fed diets containing different corn hybrids, with or without the inclusion of enzymatic blend, and dried at different temperatures.

| Hybrids | Digestible Energy |                   |                   |                   | CDDM               |                    |                    |                    | CDCP               |                    |                    |                    | CDMM               |                    |                    |                    |
|---------|-------------------|-------------------|-------------------|-------------------|--------------------|--------------------|--------------------|--------------------|--------------------|--------------------|--------------------|--------------------|--------------------|--------------------|--------------------|--------------------|
|         | with              |                   | without           |                   | with               |                    | without            |                    | with               |                    | without            |                    | with               |                    | without            |                    |
|         | 80 °C             | 110 °C            | 80 °C             | 110 °C            | 80 °C              | 110 °C             | 80 °C              | 110 °C             | 80 °C              | 110 °C             | 80 °C              | 110 °C             | 80 °C              | 110 °C             | 80 °C              | 110 °C             |
| 1       | 2838 <sup>b</sup> | 3084 <sup>a</sup> | 2976 <sup>a</sup> | 2980 <sup>a</sup> | 62.50 <sup>b</sup> | 67.58 <sup>a</sup> | 65.28 <sup>a</sup> | 64.72 <sup>a</sup> | 68.36 <sup>a</sup> | 72.59 <sup>a</sup> | 71.67 <sup>a</sup> | 68.08 <sup>b</sup> | 36.08 <sup>a</sup> | 42.65 <sup>a</sup> | 38.10 <sup>a</sup> | 22.65 <sup>b</sup> |
| 2       | 3255 <sup>a</sup> | 3025 <sup>b</sup> | 2865 <sup>a</sup> | 2799 <sup>a</sup> | 71.97 <sup>a</sup> | 66.18 <sup>b</sup> | 63.01 <sup>a</sup> | 61.26 <sup>a</sup> | 76.42 <sup>a</sup> | 72.54 <sup>b</sup> | 67.85 <sup>a</sup> | 66.48 <sup>a</sup> | 52.27 <sup>a</sup> | 38.60 <sup>b</sup> | 30.41 <sup>a</sup> | 37.01 <sup>a</sup> |
| 3       | 3086 <sup>a</sup> | 3223 <sup>a</sup> | 2915 <sup>a</sup> | 2465 <sup>b</sup> | 68.18 <sup>a</sup> | 71.56 <sup>a</sup> | 64.85 <sup>a</sup> | 54.34 <sup>b</sup> | 72.21 <sup>a</sup> | 71.06 <sup>a</sup> | 60.84 <sup>a</sup> | 59.92 <sup>a</sup> | 40.57 <sup>a</sup> | 46.27 <sup>a</sup> | 26.69 <sup>a</sup> | 34.54 <sup>a</sup> |

CDDM = coefficient of digestibility of dry matter; CDCP = coefficient of digestibility of crude protein; CDMM = coefficient of digestibility of mineral matter; <sup>a,b</sup>Means within each group (with or without inclusion of enzymatic blend) for each corn hybrid, followed by different letters in the row are different ( $p \leq 0.05$ ) by F test; The enzymatic blend contained 80 KNU/kg of amylase (RONOZYME® HiStarch), 100 FXU/kg of xylanase (RONOZYME® WX), and 15,000 PROT/kg of protease (RONOZYME® ProAct), and all the diets were formulated with the inclusion of phytase (1,000 FYT/kg of feed, RONOZYME® Hiphos).

**Table S9.** Carcass yield, cuts yield (%) and percentage of abdominal fat (%) of broilers, at 42 days of age, fed diets containing different corn hybrids, dried at two temperatures and with or without inclusion of enzymatic blend.

| Treatments          | Carcass | Breast | Leg                | Wings | Abdominal Fat     |
|---------------------|---------|--------|--------------------|-------|-------------------|
| Hybrids             |         |        |                    |       |                   |
| 1                   | 77.07   | 37.14  | 27.10              | 9.27  | 4.38              |
| 2                   | 77.42   | 37.35  | 27.19              | 9.22  | 4.26              |
| 3                   | 77.43   | 37.17  | 27.31              | 9.18  | 4.20              |
| Temperature         |         |        |                    |       |                   |
| 80 °C               | 77.42   | 37.45  | 27.10              | 9.27  | 4.30              |
| 110 °C              | 77.19   | 36.98  | 27.30              | 9.17  | 4.25              |
| Enzyme              |         |        |                    |       |                   |
| With enzyme         | 77.34   | 37.05  | 27.42 <sup>a</sup> | 9.24  | 4.20 <sup>b</sup> |
| Without enzyme      | 77.26   | 37.38  | 26.97 <sup>b</sup> | 9.21  | 4.36 <sup>a</sup> |
| SEM                 | 1.729   | 4.169  | 3.714              | 3.507 | 8.868             |
| Source of variation |         |        | <i>p</i> -Values   |       |                   |
| Hybrid, Hyb         | 0.468   | 0.818  | 0.683              | 0.500 | 0.120             |
| Temperature, Temp   | 0.380   | 0.108  | 0.298              | 0.112 | 0.516             |
| Enzyme, ENZ         | 0.763   | 0.263  | 0.022              | 0.665 | 0.025             |
| Hyb*ENZ             | 0.721   | 0.218  | 0.321              | 0.893 | 0.755             |
| Hyb*Temp            | 0.794   | 0.067  | 0.838              | 0.070 | 0.892             |
| ENZ*Temp            | 0.675   | 0.448  | 0.069              | 0.207 | 0.931             |
| Hyb*ENZ*Temp        | 0.798   | 0.280  | 0.978              | 0.622 | 0.580             |

<sup>a,b</sup>Means followed by distinct letters in the same column are different ( $p \leq 0.05$ ) by F test; The enzymatic blend contained 80 KNU/kg of amylase (RONOZYME® HiStarch), 100 FXU/kg of xylanase (RONOZYME® WX), and 15,000 PROT/kg of protease (RONOZYME® ProAct), and all the diets were formulated with the inclusion of phytase (1,000 FYT/kg of feed, RONOZYME® Hiphos).
